# Supplementary material
Source: Springer Nature journal article supplement (https://www.springermedizin.de/resource/supplementary/12974_2011_410_MOESM7_ESM.pdf/9601234)

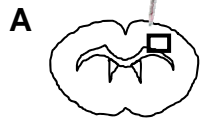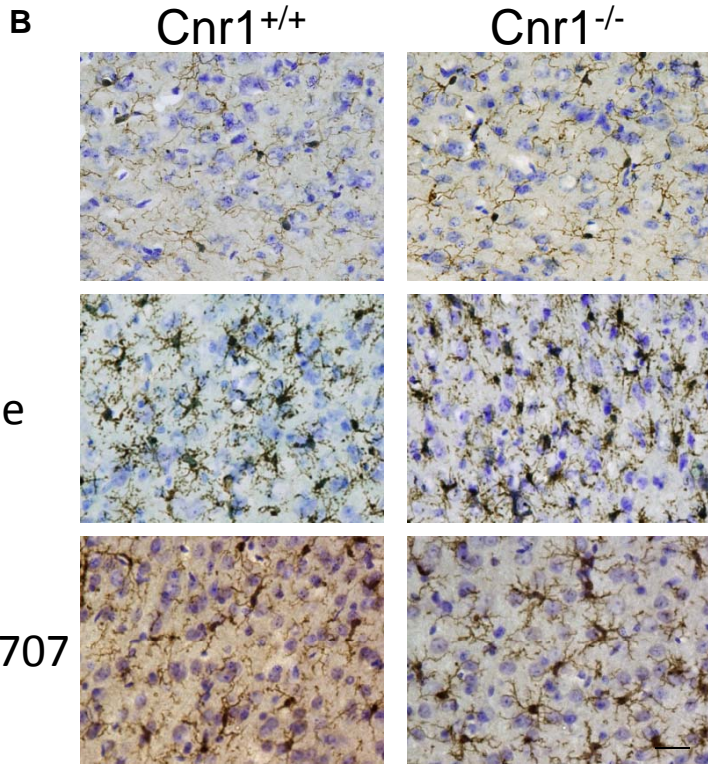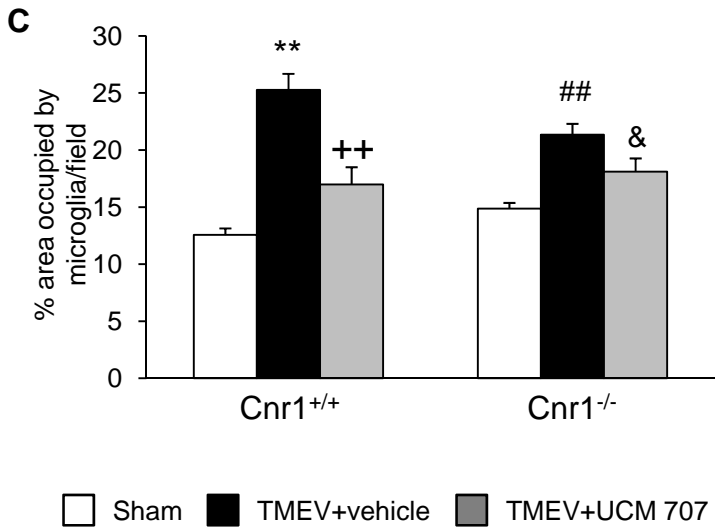

Supplement: MOESM7 [file 9601234]
